# Supplementary material for: Structural basis for recruitment of the CHK1 DNA damage kinase by the CLASPIN scaffold protein
Source: PubMed Central journal article supplement — Structure. 2021 Jun 3;29(6):531–539.e3. doi: 10.1016/j.str.2021.03.007 (PMC8204404; doi:10.1016/j.str.2021.03.007), 2021-06-03

**Structure, Volume 29**

**Supplemental Information**

**Structural basis for recruitment of the CHK1**

**DNA damage kinase by the CLASPIN scaffold protein**

**Matthew Day, Sarah Parry-Morris, Jack Houghton-Gisby, Antony W. Oliver, and Laurence H. Pearl**



**SUPPLEMENTARY FIGURE 2 – relates to Figure 4 – Alternative artefactual CLASPIN confirmation seen in the AU**

The two chains of CHK1 in the asymmetric unit are shown in yellow and green with the CLASPIN peptide coloured pink interacting with the phosphate binding pocket of the green CHK1 molecule and making contact with both CHK1 molecules.

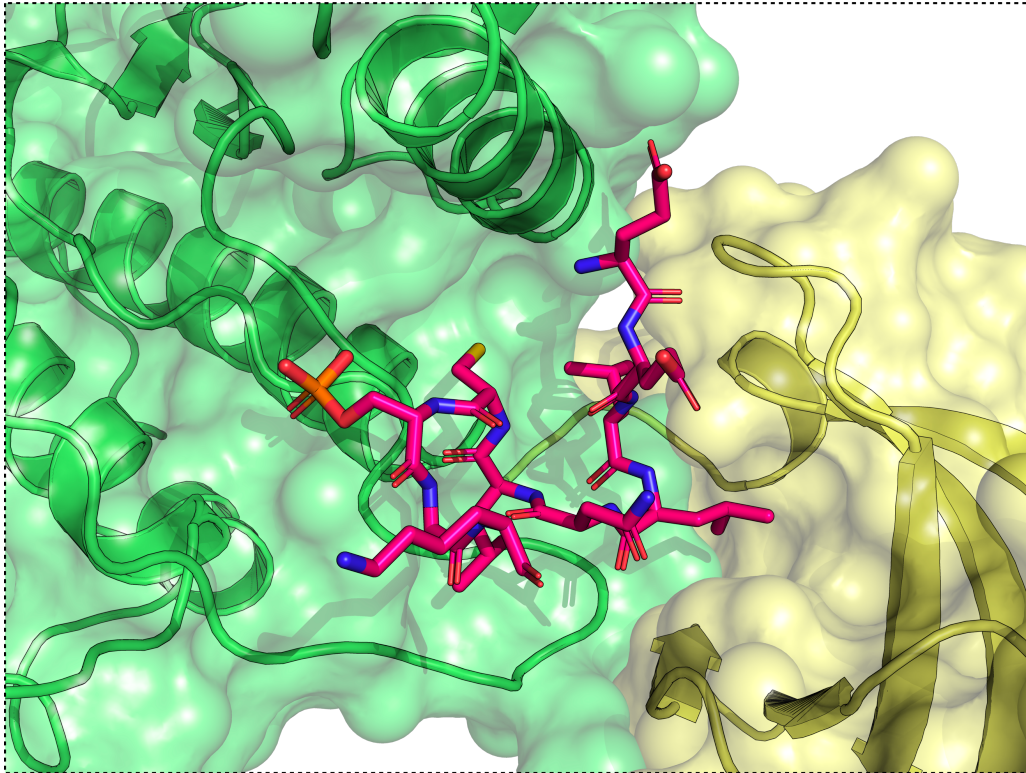

**SUPPLEMENTARY FIGURE 3 – relates to Figure 5 – Data analysis of CHK1 kinetics from NADH coupled kinase assay**

a-d) Fitted lines, and residual plots, for data in Figure 5D. NADH-coupled assay showing ATP turnover by either full length CHK1 or a CHK1 construct consisting of only the kinase domain in the presence of increasing concentrations of the CLASPIN pS945 peptide.

e) Residual plots for fitted lines shown in figure 5E

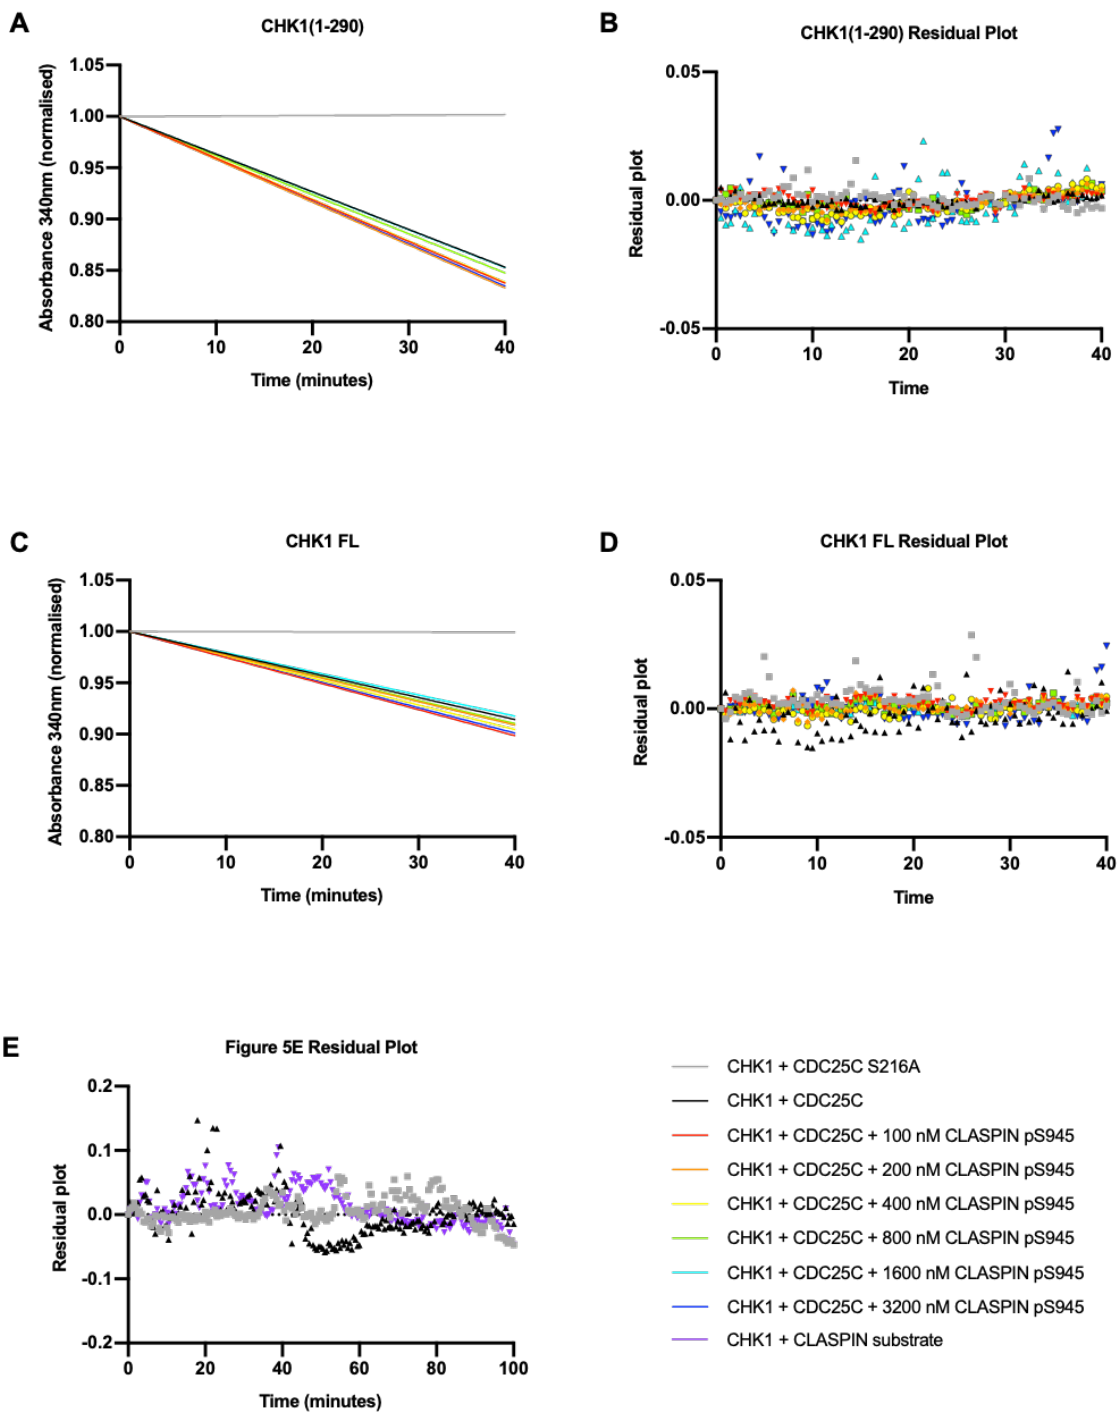

Supplement: mmc1.pdf [file mmc1.pdf]
